# Supplementary material for: The use of complementary and alternative medicine after the completion of hospital treatment for colorectal cancer: findings from a questionnaire study in Denmark
Source: PubMed Central journal article supplement (PMC4197266; doi:10.1186/1472-6882-14-388), 2014-10-10
Supplement: 12906_2014_1954_MOESM1_ESM.pdf [file 12906_2014_1954_MOESM1_ESM.pdf]

# ALTERNATIV BEHANDLING

B

## 1. Har du inden for den sidste måned brugt nogen form for alternativ og/eller komplementær behandling?

|                                                              | Ja                       | Nej                      | Ved ikke                 |
|--------------------------------------------------------------|--------------------------|--------------------------|--------------------------|
| a) Massage, osteopati eller andre manipulative terapier..... | <input type="checkbox"/> | <input type="checkbox"/> | <input type="checkbox"/> |
| b) Zoneterapi.....                                           | <input type="checkbox"/> | <input type="checkbox"/> | <input type="checkbox"/> |
| c) Akupunktur.....                                           | <input type="checkbox"/> | <input type="checkbox"/> | <input type="checkbox"/> |
| d) Healing, håndspålæggelse og lignende.....                 | <input type="checkbox"/> | <input type="checkbox"/> | <input type="checkbox"/> |
| e) Kraniosakral terapi.....                                  | <input type="checkbox"/> | <input type="checkbox"/> | <input type="checkbox"/> |
| f) Homeøpati.....                                            | <input type="checkbox"/> | <input type="checkbox"/> | <input type="checkbox"/> |
| g) Ernæringsterapi/diætbehandling.....                       | <input type="checkbox"/> | <input type="checkbox"/> | <input type="checkbox"/> |
| h) Kinesiologi.....                                          | <input type="checkbox"/> | <input type="checkbox"/> | <input type="checkbox"/> |
| i) Hypnose.....                                              | <input type="checkbox"/> | <input type="checkbox"/> | <input type="checkbox"/> |
| j) Mindfulness/meditation.....                               | <input type="checkbox"/> | <input type="checkbox"/> | <input type="checkbox"/> |
| k) Andet: _____                                              | <input type="checkbox"/> |                          |                          |

## Hvis JA, på hvilket initiativ anvender du ovenstående behandling (sæt gerne flere krydser):

- ☐ Jeg anvender alternativ og/eller komplementær behandling på eget initiativ
- ☐ Anbefalet af læge/sygeplejerske
- ☐ Anbefalet af alternativ behandler
- ☐ Anbefalet af andre patienter
- ☐ Anbefalet af familie og/eller venner
- ☐ Anbefalet ved kontakt til patientforening/sammenslutning
- ☐ Andet: \_\_\_\_\_

## 2. Har du inden for den sidste måned anvendt naturlægemidler og/eller kosttilskud (dvs. piller, kapsler, medicinsk te, ekstrakter og lignende)?

☐ Ja      ☐ Nej      ☐ Ved ikke

- sp. 2 fortsættes næste side

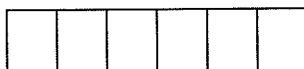

# ALTERNATIV BEHANDLING

B

- sp. 2 fortsat

**Hvis JA, anfør venligst i boksen herunder de specifikke typer af naturlægemidler og kosttilskud, som du bruger:**

**Hvis JA, på hvilket initiativ tager du naturlægemidler og/eller kosttilskud (sæt gerne flere krydser):**

- ☐ Anbefalet af alternative behandler  
☐ Jeg har købt det på eget initiativ  
☐ Anbefalet af læge/sygeplejersker  
☐ Anbefalet af andre patienter  
☐ Anbefalet af familie og/eller venner  
☐ Anbefalet ved kontakt til patientforening/sammenslutning  
☐ Andet: \_\_\_\_\_

**HVIS DU HAR KRYDSET NEJ HELE VEJEN NED I SPØRGSMÅL 1 OG I SPØRGSMÅL 2, GÅ DA TIL SPØRGSMÅL 7**

**3. Har du fortalt din behandlende læge, at du bruger alternativ behandling?**

- ☐ Ja      ☐ Nej

**4. Angiv venligst grundene til at du bruger alternativ behandling (sæt alle de krydser der passer for dig):**

- |                                                                            |                                                                                                           |                                                                                      |
|----------------------------------------------------------------------------|-----------------------------------------------------------------------------------------------------------|--------------------------------------------------------------------------------------|
| <input type="checkbox"/> For at opnå effekt på selve sygdommen             | <input type="checkbox"/> For et bedre psykisk velbefindende, give håb optimisme osv.                      | <input type="checkbox"/> For at gøre alt hvad der er muligt for at bekæmpe sygdommen |
| <input type="checkbox"/> For at øge kroppens evne til at bekæmpe sygdommen | <input type="checkbox"/> For at modarbejde dårlige virkninger fra kræften eller den medicinske behandling | <input type="checkbox"/> For selv at gøre noget aktivt                               |
| <input type="checkbox"/> For et bedre fysisk velbefindende                 | <input type="checkbox"/> Fordi det måske kan hjælpe og ikke skade                                         | <input type="checkbox"/> Andet (uddyb nedenfor)                                      |

Hvis kryds i Andet, uddyb: \_\_\_\_\_

# ALTERNATIV BEHANDLING

B

**5. Hvilke gavnige virkninger har du faktisk oplevet ved den alternative behandling?**  
(sæt alle de krydser der passer for dig):

- ☐ Ingen gavnlig virkning
- ☐ En direkte effekt på kræftsygdommen (eks. mindskning af kræfttumoren)
- ☐ Et bedre fysisk velbefindende
- ☐ En bedring af psykisk velbefindende, håb, optimisme med mere
- ☐ Reduktion af bivirkninger fra kræftsygdommen og/eller den medicinske behandling
- ☐ Kroppens egen evne til at bekæmpe sygdommen er øget
- ☐ Andet \_\_\_\_\_

**6. Hvilke skadelige virkninger har du oplevet ved den alternative behandling?**  
(sæt alle de krydser der passer for dig):

- ☐ Ingen skadelig virkning
- ☐ Påvirkning af blodprøver
- ☐ Kvalme og utilpashed
- ☐ Mavesår
- ☐ Vægttab
- ☐ Andet: \_\_\_\_\_

**7. Hvis du i spørgsmål 1 og spørgsmål 2 svarede NEJ, hvad er da hoved-årsagen til, at du for øjeblikket ikke bruger alternativ behandling?**  
(sæt ét kryds)

- |                                                                                                        |                                                                                                                                                                                        |                                                                                                               |
|--------------------------------------------------------------------------------------------------------|----------------------------------------------------------------------------------------------------------------------------------------------------------------------------------------|---------------------------------------------------------------------------------------------------------------|
| <input type="checkbox"/> Har aldrig tænkt på at bruge alternativ behandling                            | <input type="checkbox"/> Jeg har ikke råd til at betale for alternativ behandling                                                                                                      | <input type="checkbox"/> Jeg har tidligere i mit sygdomsforløb brugt alternativ behandling, men er nu stoppet |
| <input type="checkbox"/> Jeg tror ikke på behandlinger, som ikke er gennemafprøvede                    | <input type="checkbox"/> Jeg har tænkt på at bruge alternativ behandling, men er blevet frarådet af familie/venner/personale i sundhedssektoren, og besluttede derfor ikke at gøre det | <input type="checkbox"/> ANDET:<br><div style="border: 1px solid black; height: 100px; width: 100%;"></div>   |
| <input type="checkbox"/> Jeg er tilfreds med udsigterne for den etablerede behandling jeg får/har fået | <input type="checkbox"/> Jeg har tidligere i mit sygdomsforløb brugt alternativ behandling, men holder nu en pause                                                                     |                                                                                                               |

**8. Har din behandlende læge spurgt dig, om du anvender alternativ behandling?**

- ☐ Ja      ☐ Nej
